# Supplementary material for: The RNA Methylation Modification 5-Methylcytosine Impacts Immunity Characteristics, Prognosis and Progression of Oral Squamous Cell Carcinoma by Bioinformatics Analysis
Source: Front Bioeng Biotechnol. 2021 Dec 9;9:760724. doi: 10.3389/fbioe.2021.760724 (PMC8696036; doi:10.3389/fbioe.2021.760724)
Supplement: Supplementary file 1 [file Table2.XLSX]

## Sheet: Table S1 Information for datase
Table.S1 Information for datasets selected in this study
Accession Number	GPL	Platform	Sample number	Reference
TCGA-HNSCC	-	-	322 OSCC samples; 32 normal samples	-
GSE65858	GPL10558	Illumina HumanHT-12 V4.0 expression beadchip	83 OSCC samples	Wichmann G. et al.
GSE41613	GPL570	Affymetrix Human Genome U133 Plus 2.0 Array	97 OSCC samples	Lohavanichbutr P. et al.
GSE26549	GPL6244	Affymetrix Human Gene 1.0 ST Array [transcript (gene) version]	86 oral leukoplakia samples	Saintigny P. et al.
GSE31056	GPL10526	Affymetrix GeneChip Human Genome HG-U133 Plus 2 Array	22 OSCC samples	Reis PP. et al.
GSE85195	GPL6480	Agilent-014850 Whole Human Genome Microarray 4x44K G4112F (Probe Name version)	34 OSCC samples; 15 oral leukoplakia samples	Bhosale PG. et al.

## Sheet: Table S2 Clinicopathological fe
Table.S2 Clinicopathological features of OSCC patients
Features		TCGA (n = 322)		GSE65858 (n = 83)		GSE41613(n = 97)		GSE31056(n = 22)		GSE85195(n = 34)
		Amount	%	Amount	%	Amount	%	Amount	%	Amount	%
Age
≤60		154	0.4783	47	0.5663	50	0.5155	-	-	25	0.7353
>60		168	0.5217	36	0.4337	47	0.4845	-	-	9	0.2647
Gender
Male		221	0.6863	64	0.7711	66	0.6804	-	-	25	0.7353
Female		101	0.3137	19	0.2289	31	0.3196	-	-	9	0.2647
Clinical stage
I		11	0.0341	10	0.1205	-	-	0	0	2	0.0588
II		78	0.2422	12	0.1446	-	-	4	0.1818	22	0.6471
III		64	0.1988	8	0.0963	-	-	1	0.0455	7	0.2059
IV		159	0.4938	53	0.6386	-	-	8	0.3636	3	0.0882
Unknown		10	0.0311	0	0	-	-	9	0.4091	0	0
TNM stage
T	T1	18	0.0559	14	0.1687	-	-	-	-	-	-
	T2	103	0.3199	22	0.2651	-	-	-	-	-	-
	T3	80	0.2484	8	0.0963	-	-	-	-	-	-
	T4	111	0.3447	39	0.4699	-	-	-	-	-	-
	Unknown	10	0.0311	0	0	-	-	-	-	-	-
N	N0	164	0.5093	36	0.4337	-	-	-	-	-	-
	N1	56	0.1739	9	0.1085	-	-	-	-	-	-
	N2	85	0.264	36	0.4337	-	-	-	-	-	-
	N3	3	0.0093	2	0.0241	-	-	-	-	-	-
	Unknown	14	0.0435	0	0	-	-	-	-	-	-
M	M0	303	0.941	81	0.9759	-	-	-	-	-	-
	M1	2	0.0062	2	0.0241	-	-	-	-	-	-
	Unknown	17	0.0528	0	0	-	-	-	-	-	-
HPV infection
Yes		27	0.0336	13	0.1566	0	0	-	-	-	-
No		292	0.1346	70	0.8434	97	1	-	-	-	-
Unknown		3	0.8318	0	0	0	0	-	-	-	-

## Sheet: Table S3 Gene sets of 27 immune
Table.S3 Gene sets of 27 immune cell types for ssGSEA
aDCs	CD83	LAMP3	CCL1
APC_co_inhibition	C10orf54	CD274	LGALS9	PDCD1LG2	PVRL3
APC_co_stimulation	CD40	CD58	CD70	ICOSLG	SLAMF1	TNFSF14	TNFSF15	TNFSF18	TNFSF4	TNFSF8	TNFSF9
B_cells	BACH2	BANK1	BLK	BTLA	CD79A	CD79B	FCRL1	FCRL3	HVCN1	RALGPS2
CCR	CCL16	TPO	TGFBR2	CXCL2	CCL14	TGFBR3	IL11RA	CCL11	IL4I1	IL33	CXCL12	CXCL10	BMPER	BMP8A	CXCL11	IL21R	IL17B	TNFRSF9	ILF2	CX3CR1	CCR8	TNFSF12	CSF3	TNFSF4	BMP3	CX3CL1	BMP5	CXCR2	TNFRSF10D	BMP2	CXCL14	CCL28	CXCL3	BMP6	CCL21	CXCL9	CCL23	IL6	TNFRSF18	IL17RD	IL17D	IL27	CCL7	IL1R1	CXCR4	CXCR2P1	TGFB1I1	IFNGR1	IL9R
CD8+_T_cells	CD8A
Check-point	IDO1	LAG3	CTLA4	TNFRSF9	ICOS	CD80	PDCD1LG2	TIGIT	CD70	TNFSF9	ICOSLG	KIR3DL1	CD86	PDCD1	LAIR1	TNFRSF8	TNFSF15	TNFRSF14	IDO2	CD276	CD40	TNFRSF4	TNFSF14	HHLA2	CD244	CD274	HAVCR2	CD27	BTLA	LGALS9	TMIGD2	CD28	CD48	TNFRSF25	CD40LG	ADORA2A	VTCN1	CD160	CD44	TNFSF18	TNFRSF18	BTNL2	C10orf54	CD200R1	TNFSF4	CD200	NRP1
Cytolytic_activity	PRF1	GZMA
DCs	CCL17	CCL22	CD209	CCL13
HLA	HLA-E	HLA-DPB2	HLA-C	HLA-J	HLA-DQB1	HLA-DQB2	HLA-DQA2	HLA-DQA1	HLA-A	HLA-DMA	HLA-DOB	HLA-DRB1	HLA-H	HLA-B	HLA-DRB5	HLA-DOA	HLA-DPB1	HLA-DRA	HLA-DRB6	HLA-L	HLA-F	HLA-G	HLA-DMB	HLA-DPA1
iDCs	CD1A	CD1E
Macrophages	C11orf45	CD68	CLEC5A	CYBB	FUCA1	GPNMB	HS3ST2	LGMN	MMP9	TM4SF19
Mast_cells	CMA1	MS4A2	TPSAB1
MHC_class_I	B2M	HLA-A	TAP1
Neutrophils	EVI2B	HSD17B11	KDM6B	MEGF9	MNDA	NLRP12	PADI4	SELL	TRANK1	VNN3
NK_cells	KLRC1	KLRF1
pDCs	CLEC4C	CXCR3	GZMB	IL3RA	IRF7	IRF8	LILRA4	PHEX	PLD4	PTCRA
T_cell_co-inhibition	BTLA	C10orf54	CD160	CD244	CD274	CTLA4	HAVCR2	LAG3	LAIR1	TIGIT
T_cell_co-stimulation	CD2	CD226	CD27	CD28	CD40LG	ICOS	SLAMF1	TNFRSF18	TNFRSF25	TNFRSF4	TNFRSF8	TNFRSF9	TNFSF14
T_helper_cells	CD4
Tfh	PDCD1	CXCL13	CXCR5
Th1_cells	IFNG	TBX21	CTLA4	STAT4	CD38	IL12RB2	LTA	CSF2
Th2_cells	PMCH	LAIR2	SMAD2	CXCR6	GATA3	IL26
TIL	ITM2C	CD38	THEMIS2	GLYR1	ICOS	F5	TIGIT	KLRD1	IRF4	PRKCQ	FCRL5	SIRPG	LPXN	IL2RG	CCL5	LCK	TRAF3IP3	CD86	MAL	LILRB1	DOK2	CD6	PAG1	LAX1	PLEK	PIK3CD	SLAMF1	XCL1	GPR171	XCL2	TBX21	CD2	CD53	KLHL6	SLAMF6	CD40	SIT1	TNFRSF4	CD79A	CD247	LCP2	CD3D	CD27	SH2D1A	FYB	ARHGAP30	ACAP1	CST7	CD3G
Treg	IL12RB2	TMPRSS6	CTSC	LAPTM4B	TFRC	RNF145	NETO2	ADAT2	CHST2	CTLA4	NFE2L3	LIMA1	IL1R2	ICOS	HSDL2	HTATIP2	FKBP1A	TIGIT	CCR8	LTA	SLC35F2	IL21R	AHCYL1	SOCS2	ETV7	BCL2L1	RRAGB	ACSL4	CHRNA6	BATF	LAX1	ADPRH	TNFRSF4	ANKRD10	CD274	CASP1	LY75	NPTN	SSTR3	GRSF1	CSF2RB	TMEM184C	NDFIP2	ZBTB38	ERI1	TRAF3	NAB1	HS3ST3B1	LAYN
Type_I_IFN_Reponse	DDX4	IFIT1	IFIT2	IFIT3	IRF7	ISG20	MX1	MX2	RSAD2	TNFSF10
Type_II_IFN_Reponse	GPR146	SELP	AHR
[truncated: 212 more columns]

## Sheet: Table S4 Sellected genes in yel
Table S3 Sellected genes in yellow module
FEN1
CHAF1B
ATAD2
CHAF1A
TROAP
MAD2L1
ASF1B
CDC6
DNA2
FANCI
PLK4
CCNB2
LIN9
TOP2A
FBXO5
KNTC1
TMPO
NUSAP1
CDCA8
TPX2
PRIM1
PSMC3IP
KIF2C
MSH2
BUB1
KIF4A
CENPA
BRCA1
MCM2
KIF15
BLM
TIMELESS
DSCC1
MCM6
RFC4
ZWINT
HELLS
BUB1B
RFC5
KIFC1
RAD51AP1
MCM7
CENPO
MCM3
DTL
NUF2
MSH6
UBE2T
SPAG5
RAD54L
EME1
EXO1
NEK2
